# Supplementary material
Source: ML conference proceedings conference paper supplement (https://proceedings.neurips.cc/paper_files/paper/2022/hash/285b06e0dd856f20591b0a5beb954151-Abstract.html)
Supplement: Supplementary file 1 [file 285b06e0dd856f20591b0a5beb954151-Supplemental-Conference.zip]

Archive with 1 entries (1 files):
- supplementary.pdf
